# Supplementary material for: Epigenetics of Host–Pathogen Interactions: The Road Ahead and the Road Behind
Source: PLOS journal article supplement (doi:10.1371/journal.ppat.1003007), 2012-11-29

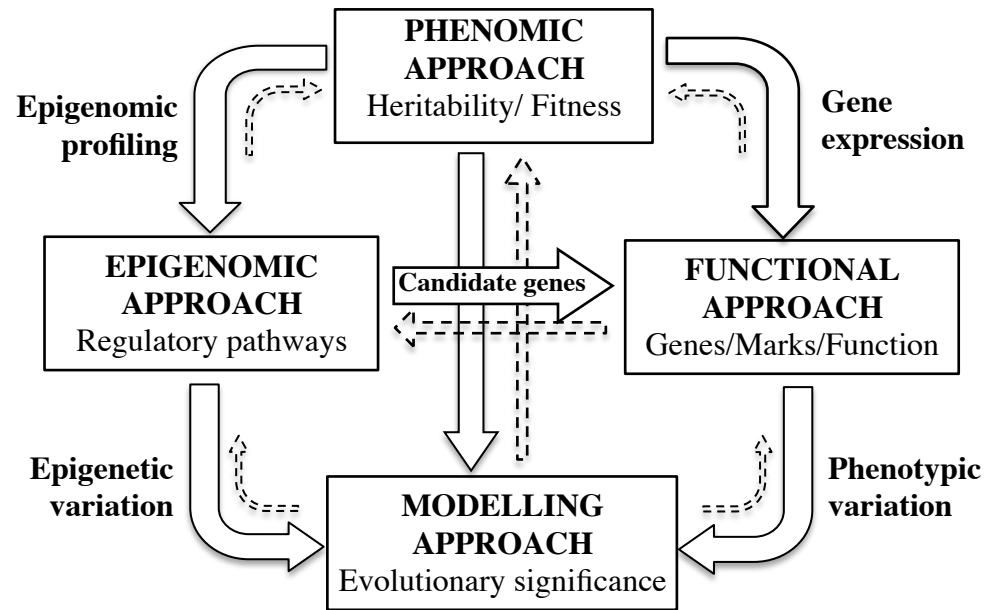

Supplement: S2 (10.1371/journal.ppat.1003007.s002) [file journal.ppat.1003007.s002]
